# Supplementary material for: An inorganic–organic hybrid crystal with a two-step dielectric response and thermochromic luminescence
Source: Royal Society of Chemistry journal article supplement (doi:10.1039/c6dt03691k), 2017-01-01
Supplement: c6dt03691k1.pdf [file c6dt03691k1.pdf]

## **An inorganic-organic hybrid crystal with two steps dielectric response and thermochromic luminescence**

Hai-Bao Duan,<sup>\*a,b</sup> Shan-Shan Yu,<sup>a</sup> Shao-Xian Liu,<sup>a</sup> and Hui Zhang<sup>a</sup>

<sup>a</sup> Key laboratory of Advanced Functional Materials of Nanjing, Nanjing Xiaozhuang University, Nanjing 211171, P. R. China

<sup>b</sup> Department of Chemistry and Biochemistry, University of California, Los Angeles, California 90095-1569, United States

Tel.: +86 25 86178274

Fax: +86 25 86178274

E-mail: [duanhaibao4660@163.com](mailto:duanhaibao4660@163.com)

**Table S1** Crystallographic data and refinement parameter of **1** at selected temperature

|                                                                                          |                                                                 |                                                                 |                                                                 |                                                                 |                                                                 |
|------------------------------------------------------------------------------------------|-----------------------------------------------------------------|-----------------------------------------------------------------|-----------------------------------------------------------------|-----------------------------------------------------------------|-----------------------------------------------------------------|
| Temperature (K)                                                                          | 150                                                             | 200                                                             | 250                                                             | 300                                                             | 350                                                             |
| Wavelength (Å)                                                                           | 0.71073                                                         | 0.71073                                                         | 0.71073                                                         | 0.71073                                                         | 0.71073                                                         |
| Empirical formula                                                                        | C <sub>7</sub> H <sub>11</sub> I <sub>3</sub> N <sub>2</sub> Pb | C <sub>7</sub> H <sub>11</sub> I <sub>3</sub> N <sub>2</sub> Pb | C <sub>7</sub> H <sub>11</sub> I <sub>3</sub> N <sub>2</sub> Pb | C <sub>7</sub> H <sub>11</sub> I <sub>3</sub> N <sub>2</sub> Pb | C <sub>7</sub> H <sub>11</sub> I <sub>3</sub> N <sub>2</sub> Pb |
| Formula weight                                                                           | 711.10                                                          | 711.10                                                          | 711.10                                                          | 711.10                                                          | 711.10                                                          |
| CCDC no.                                                                                 | 1523553                                                         | 1523554                                                         | 1523555                                                         | 1523556                                                         | 1523557                                                         |
| Crystal system                                                                           | orthorhombic                                                    | orthorhombic                                                    | orthorhombic                                                    | orthorhombic                                                    | orthorhombic                                                    |
| Space group                                                                              | <i>Pnma</i>                                                     | <i>Pnma</i>                                                     | <i>Pnma</i>                                                     | <i>Pnma</i>                                                     | <i>Pnma</i>                                                     |
| <i>a</i> (Å)                                                                             | 7.8023(9)                                                       | 7.8158(8)                                                       | 7.8294(7)                                                       | 7.8382(6)                                                       | 7.8530(15)                                                      |
| <i>b</i> (Å)                                                                             | 10.3378(12)                                                     | 10.3604(10)                                                     | 10.3796(9)                                                      | 10.3922(7)                                                      | 10.418(2)                                                       |
| <i>c</i> (Å)                                                                             | 18.120(2)                                                       | 18.1750(18)                                                     | 18.2256(16)                                                     | 18.2707(13)                                                     | 18.343(4)                                                       |
| <i>V</i> (Å <sup>3</sup> )/ <i>Z</i>                                                     | 1461.6(3) /4                                                    | 1471.7(3) /4                                                    | 1481.1(2) /4                                                    | 1488.3(1)/4                                                     | 1500.6(5)/4                                                     |
| $\rho$ (g·cm <sup>-3</sup> )                                                             | 3.236                                                           | 3.209                                                           | 3.189                                                           | 3.174                                                           | 3.14                                                            |
| <i>F</i> (000)                                                                           | 1232                                                            | 1232                                                            | 1232                                                            | 1232                                                            | 1232                                                            |
| Abs. coeff. (mm <sup>-1</sup> )                                                          | 17.849                                                          | 17.726                                                          | 17.61                                                           | 17.57                                                           | 17.38                                                           |
| $\theta$ Ranges (data collection; °)                                                     | 0.993 - 27.67                                                   | 0.996 - 27.65                                                   | 0.991- 27.65                                                    | 0.998- 25.00                                                    | 0.999- 25.00                                                    |
| Index ranges                                                                             | -10 ≤ <i>h</i> ≤ 10                                             | -10 ≤ <i>h</i> ≤ 10                                             | -10 ≤ <i>h</i> ≤ 10                                             | -9 ≤ <i>h</i> ≤ 9                                               | -9 ≤ <i>h</i> ≤ 9                                               |
|                                                                                          | -13 ≤ <i>k</i> ≤ 13                                             | -13 ≤ <i>k</i> ≤ 13                                             | -13 ≤ <i>k</i> ≤ 13                                             | -12 ≤ <i>k</i> ≤ 12                                             | -12 ≤ <i>k</i> ≤ 12                                             |
|                                                                                          | -23 ≤ <i>l</i> ≤ 23                                             | -23 ≤ <i>l</i> ≤ 23                                             | -23 ≤ <i>l</i> ≤ 23                                             | -21 ≤ <i>l</i> ≤ 21                                             | -21 ≤ <i>l</i> ≤ 21                                             |
| Independent reflections/restraints/parameters                                            | 1790/0/71                                                       | 1804/0/71                                                       | 1804/0/71                                                       | 1393/0/71                                                       | 1403/0/71                                                       |
| Goodness of fit on <i>F</i> <sup>2</sup>                                                 | 1.103                                                           | 1.077                                                           | 1.127                                                           | 1.041                                                           | 1.448                                                           |
| <i>R</i> <sub>1</sub> , <i>wR</i> <sub>2</sub> <sup>a</sup> [ <i>I</i> > 2σ( <i>I</i> )] | 0.033, 0.087                                                    | 0.0333, 0.0869                                                  | 0.0347, 0.0906                                                  | 0.0666, 0.1886                                                  | 0.1457, 0.3697                                                  |
| <i>R</i> <sub>1</sub> , <i>wR</i> <sub>2</sub> <sup>a</sup> [all data]                   | 0.037, 0.090                                                    | 0.0391, 0.0902                                                  | 0.0424, 0.0945                                                  | 0.0708, 0.1941                                                  | 0.1577, 0.3872                                                  |

Residual (e·nm<sup>-3</sup>)    1.178/-2.314    1.086/-2.137    0.873/-2.007    3.534/-2.709    12.377/-7.704

$$^a R_1 = \sum ||F_o| - |F_c|| / |F_o|, wR_2 = [\sum w(\sum F_o^2 - F_c^2)^2 / \sum w(F_o^2)^2]^{1/2}$$

**Table S2** Anisotropic and isotropic displacement parameters of **1** at selected temperature

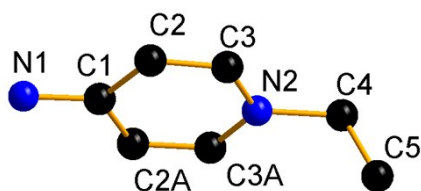

|                         | T / K | C (1)     | C (2)      | C (3)      | C (4)     | C (5)    | N (1)     | N (2)     |
|-------------------------|-------|-----------|------------|------------|-----------|----------|-----------|-----------|
| $U_{eq} / \text{\AA}^2$ | 150   | 0.023(2)  | 0.0318(16) | 0.0366(18) | 0.060(4)  | 0.056(4) | 0.037(2)  | 0.037(2)  |
|                         | 200   | 0.033(2)  | 0.0403(18) | 0.047(2)   | 0.070(5)  | 0.072(5) | 0.048(3)  | 0.048(3)  |
|                         | 250   | 0.040(2)  | 0.049(2)   | 0.057(2)   | 0.093(6)  | 0.089(6) | 0.063(3)  | 0.058(3)  |
|                         | 300   | 0.047(5)  | 0.062(4)   | 0.065(4)   | 0.073(6)  | 0.073(7) | 0.064(4)  | 0.072(5)  |
|                         | 350   | 0.051(10) | 0.079(11)  | 0.080(10)  | 0.103(18) | 0.13(3)  | 0.090(13) | 0.078(11) |
| $U_{11} / \text{\AA}^2$ | 150   | 0.020(5)  | 0.040(4)   | 0.043(4)   | 0.038(7)  | 0.024(6) | 0.038(5)  | 0.029(5)  |
|                         | 200   | 0.033(5)  | 0.051(5)   | 0.050(5)   | 0.045(7)  | 0.033(7) | 0.048(6)  | 0.035(5)  |

|                         |     |           |           |           |           |           |           |           |
|-------------------------|-----|-----------|-----------|-----------|-----------|-----------|-----------|-----------|
|                         | 250 | 0.040(6)  | 0.064(5)  | 0.063(5)  | 0.066(9)  | 0.048(9)  | 0.067(7)  | 0.044(5)  |
|                         | 300 | 0.04(2)   | 0.057(17) | 0.068(16) | 0.09(3)   | 0.10(5)   | 0.07(2)   | 0.061(19) |
|                         | 350 | 0.05(3)   | 0.08(3)   | 0.08(2)   | 0.10(5)   | 0.13(7)   | 0.09(3)   | 0.08(3)   |
|                         | 150 | 0.027(5)  | 0.025(3)  | 0.045(5)  | 0.123(14) | 0.108(13) | 0.031(5)  | 0.066(7)  |
|                         | 200 | 0.034(5)  | 0.029(3)  | 0.053(5)  | 0.142(15) | 0.125(15) | 0.039(5)  | 0.081(8)  |
| $U_{22} / \text{\AA}^2$ | 250 | 0.041(5)  | 0.035(4)  | 0.061(5)  | 0.177(19) | 0.156(19) | 0.045(5)  | 0.094(8)  |
|                         | 300 | 0.04(2)   | 0.057(19) | 0.068(19) | 0.09(3)   | 0.10(5)   | 0.07(2)   | 0.061(19) |
|                         | 350 | 0.05(2)   | 0.08(3)   | 0.08(3)   | 0.10(5)   | 0.13(7)   | 0.09(3)   | 0.08(3)   |
|                         | 150 | 0.022(5)  | 0.030(4)  | 0.022(3)  | 0.019(5)  | 0.036(7)  | 0.043(6)  | 0.016(4)  |
|                         | 200 | 0.033(5)  | 0.040(4)  | 0.037(4)  | 0.022(5)  | 0.057(9)  | 0.058(6)  | 0.028(5)  |
| $U_{33} / \text{\AA}^2$ | 250 | 0.038(6)  | 0.049(5)  | 0.047(5)  | 0.036(7)  | 0.062(10) | 0.077(8)  | 0.036(5)  |
|                         | 300 | 0.045(17) | 0.057(14) | 0.068(14) | 0.09(3)   | 0.10(4)   | 0.073(19) | 0.061(16) |
|                         | 350 | 0.051(19) | 0.08(2)   | 0.080(19) | 0.10(3)   | 0.13(6)   | 0.09(3)   | 0.08(2)   |

**Table S3** CIE coordinates of **1** at selected temperature

| Temperature (K) | CIE coordinates |
|-----------------|-----------------|
| 300             | (0.408, 0.447)  |
| 275             | (0.425, 0.462)  |
| 250             | (0.435, 0.471)  |
| 225             | (0.426, 0.479)  |
| 200             | (0.380, 0.483)  |
| 175             | (0.337, 0.476)  |
| 150             | (0.371, 0.466)  |

|     |                |
|-----|----------------|
| 125 | (0.436, 0.456) |
| 100 | (0.478, 0.441) |
| 85  | (0.491, 0.432) |
| 70  | (0.512, 0.422) |
| 55  | (0.541, 0.412) |
| 40  | (0.566, 0.399) |
| 25  | (0.581, 0.391) |
| 10  | (0.595, 0.384) |

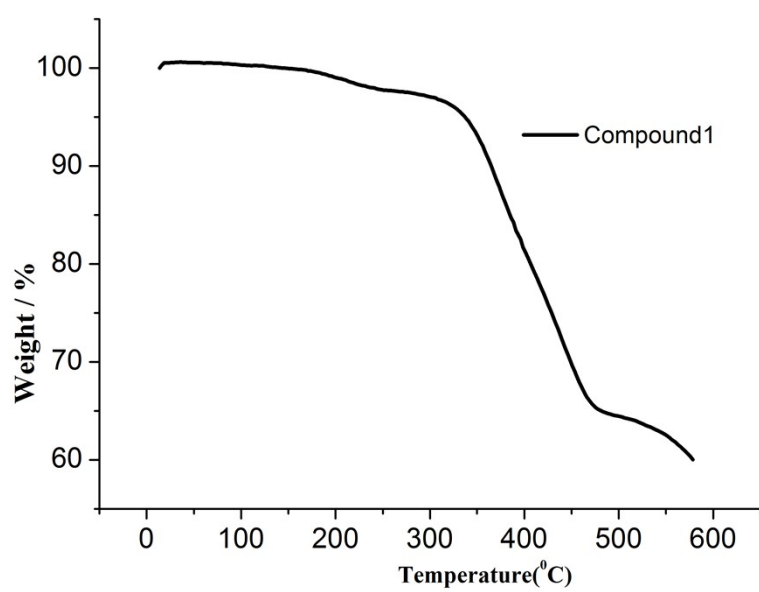

Figure S1 TG curver of 1

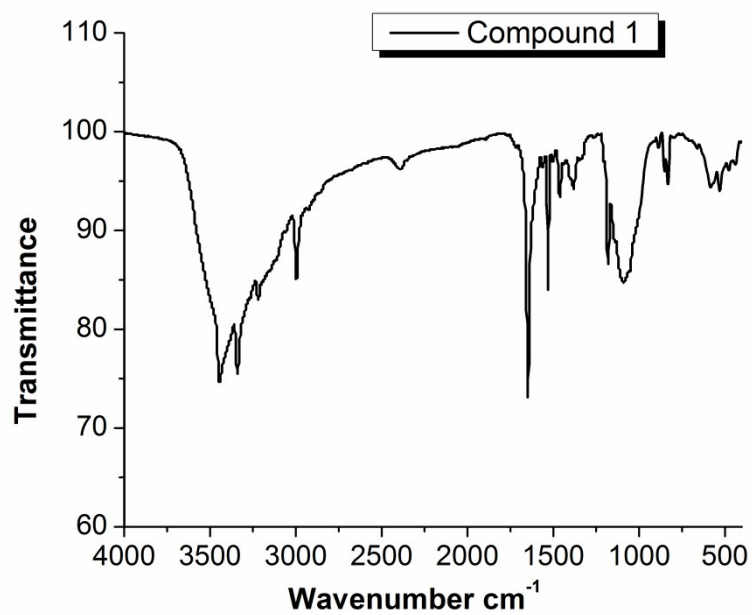

Figure S2 IR curve of **1** at room temperature

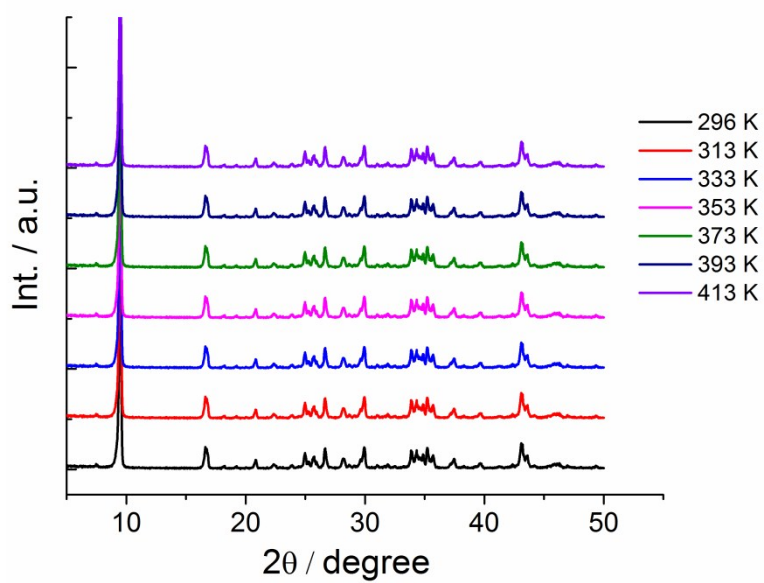

Figure S3 Temperature-dependent PXRD of **1** at 296-413 K

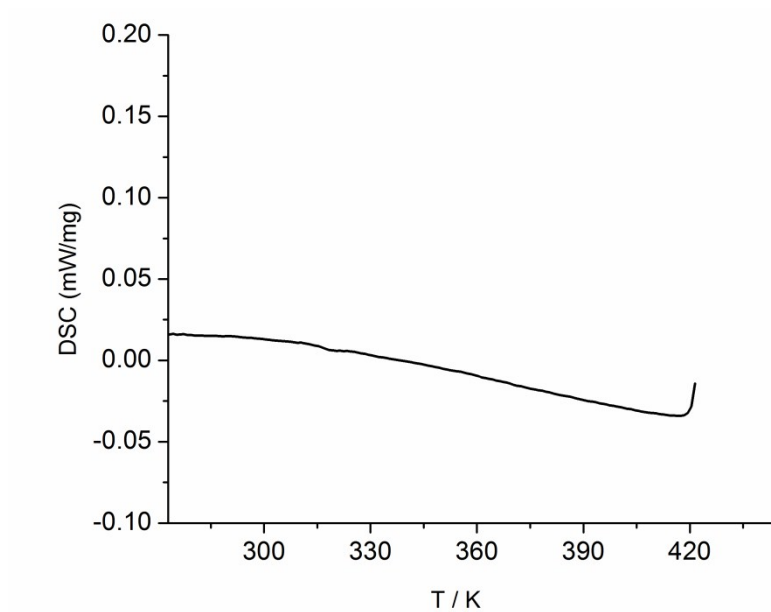

Figure S4 DSC curves of **1** in the heating run at 271-420 K

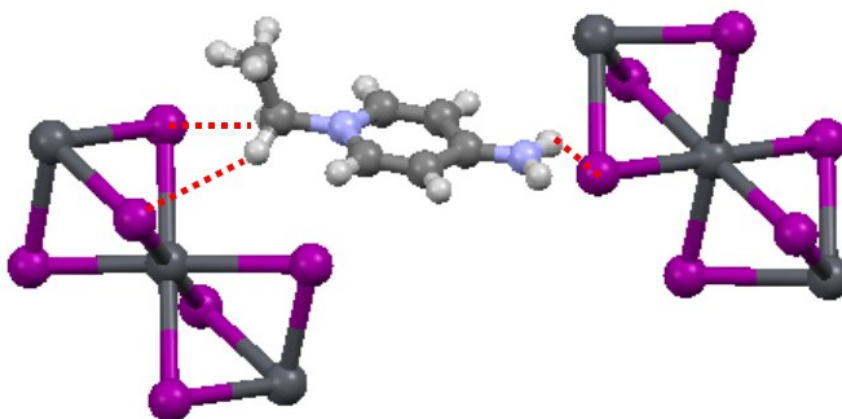

Figure S5 The charge-assisted H-bonding interactions of the cation and the I<sup>-</sup> anions of the inorganic chain

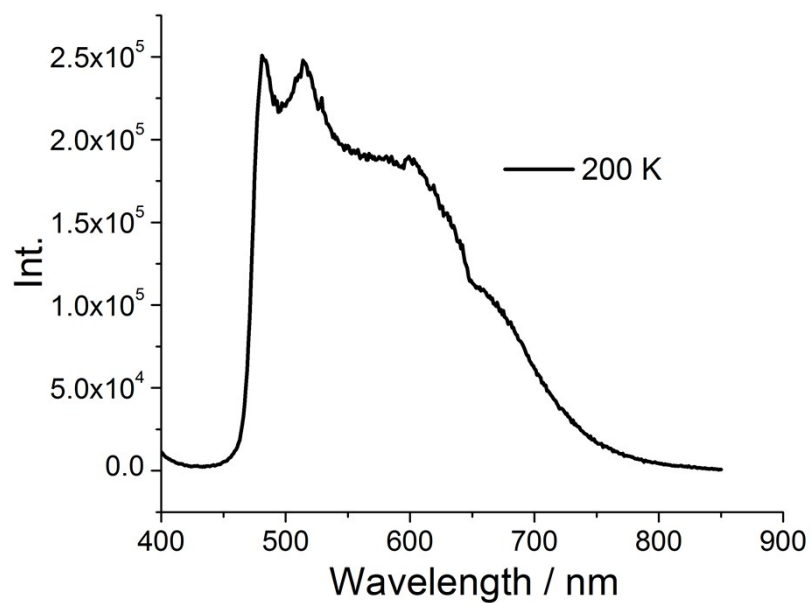

Figure S6 Emission spectra of **1** at 200 K

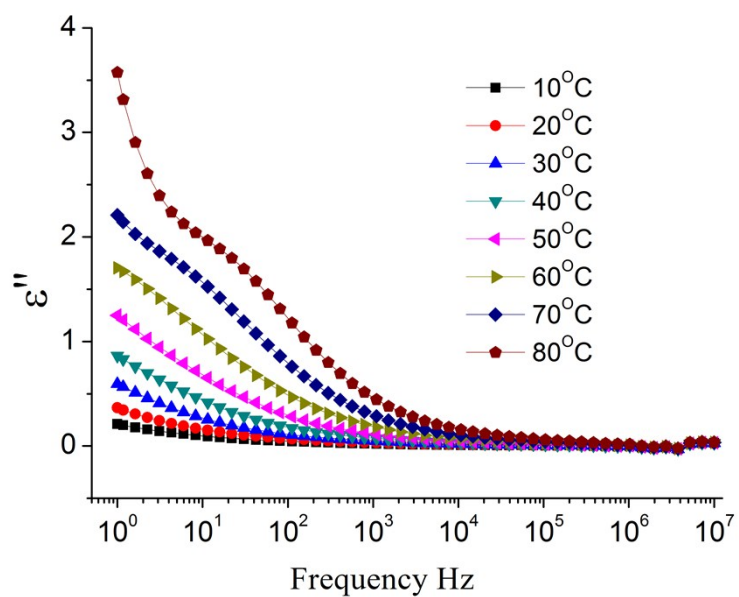

Figure S7 Frequency dependencies of the  $\epsilon''$  of **1** in the 10-80 °C temperature range



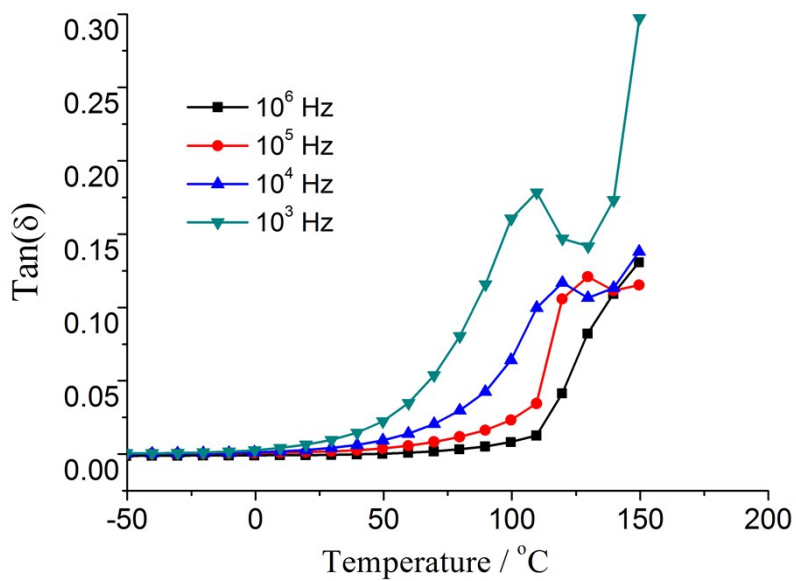

Figure S8 Temperature dependencies of  $\tan(\delta)$  of **1** at selected frequency

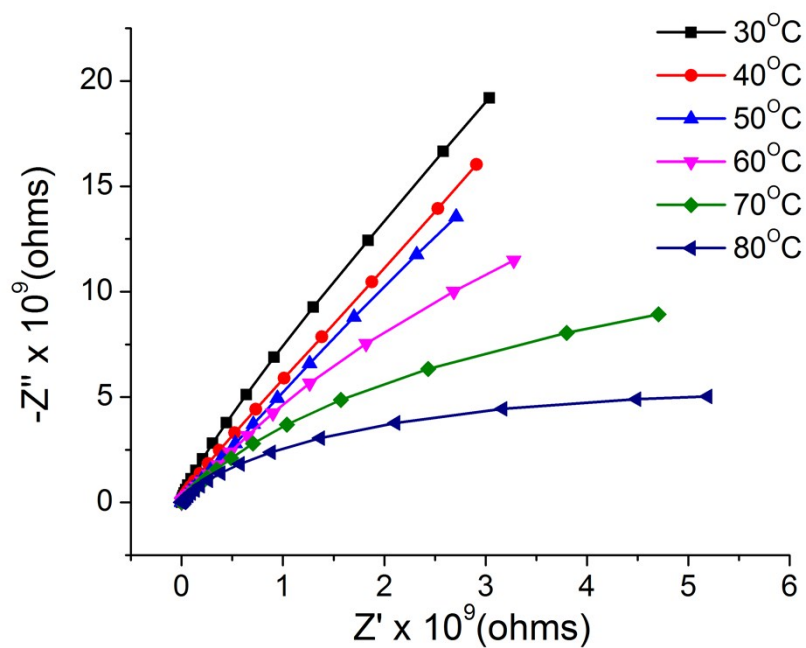

Figure S9 Complex impedance of **1** at selected temperature
